# Supplementary material for: The calcium binding protein S100β marks hedgehog-responsive resident vascular stem cells within vascular lesions
Source: Springer Nature journal article supplement (doi:10.1038/s41536-021-00120-8), 2021-03-01
Supplement: 41536_2021_120_MOESM1_ESM.pdf [file 41536_2021_120_MOESM1_ESM.pdf]

### Supplementary Table I

Antibodies and their corresponding dilutions used in immunohistochemistry.

| Antibody/Product Name                                                      | Supplier/Product Number             | Dilutions |
|----------------------------------------------------------------------------|-------------------------------------|-----------|
| Rat anti-mouse Sca1/Ly6A/E antibody [D7]<br>(FITC) antibody                | Abcam (ab25031)                     | 1/200     |
| Rabbit anti-mouse/rat alpha smooth muscle<br>cell $\alpha$ -actin antibody | Abcam (ab5694)                      | 1/200     |
| Anti-Patched / PTCH1 antibody, Mouse<br>monoclonal                         | Abcam (Ab55629)                     | 1/100     |
| Anti-Actin, $\alpha$ -Smooth Muscle antibody,<br>Mouse monoclonal          | Sigma (A5228)                       | 1/200     |
| Anti-S100- $\beta$ (CT) Antibody, clone EP1576Y,<br>rabbit monoclonal      | Millipore (04-1054)                 | 1/100     |
| Anti-Gli2 antibody, rabbit polyclonal                                      | Novus Biologicals<br>(NBP2-23602SS) | 1/50      |
| Chicken anti-GFP antibody                                                  | Abcam (ab13970)                     | 1/1000    |
| Rabbit Anti-RFP/dT antibody                                                | Abcam (ab62341)                     | 1/1000    |

### Supplementary Table II

Antibodies and their corresponding dilutions used in immunocytochemistry/western blot.

| Antibody/Product Name                                         | Supplier/Product Number | Dilutions |
|---------------------------------------------------------------|-------------------------|-----------|
| Mouse anti-mouse/rat nestin [Rat-401]                         | Abcam (ab11306)         | 1/200     |
| Rabbit anti-mouse Calponin [EP798Y]                           | Abcam (ab46794)         | 1/200     |
| Goat anti-mouse/rat/human smooth muscle<br>Myosin heavy chain | Santa Cruz (sc-79079)   | 1/200     |
| Mouse anti-human/rat SOX10                                    | R&D System (MAB2864)    | 1/100     |

|                                                   |                         |        |
|---------------------------------------------------|-------------------------|--------|
| Mouse anti-human SOX17                            | R&D System (MAB1924)    | 1/100  |
| Rabbit Anti-S100 $\beta$                          | Merck Millipore (ABN59) | 1/100  |
| Rabbit Anti-mouse/rat S100 $\beta$ [EP1576Y]      | Abcam (ab52642)         | 1/100  |
| Rabbit anti-mouse/rat Sca1                        | Millipore (AB4336)      | 1/100  |
| Alexa Fluor <sup>®</sup> 488 Goat anti-mouse IgG  | Invitrogen (A-11001)    | 1/1000 |
| Alexa Fluor <sup>®</sup> 488 Goat anti-rabbit IgG | Invitrogen (A-11008)    | 1/1000 |
| Alexa Fluor <sup>®</sup> 488 Donkey anti-goat IgG | Invitrogen (A-11055)    | 1/1000 |

### Supplementary Table III

Antibodies used in Chromatin Immunoprecipitation (ChIP)

| Antibody/Product Name                                       | Supplier/Product Number            |
|-------------------------------------------------------------|------------------------------------|
| Rabbit anti-mouse Tri-Methyl-Histone H3 (Lys27)<br>[C36B11] | Cell Signalling Technology (9733S) |
| Rabbit anti-mouse Di-Methyl-Histone H3 (Lys4)<br>[C64G9]    | Cell Signalling Technology (9725S) |
| Normal Rabbit IgG (ChIP graded)                             | Cell Signalling Technology (2729)  |

### Supplementary Table IV

Customised primers used in this study from Integrity DNA Technology (IDT).

| Customised primer    | Sequences                                                                                         |
|----------------------|---------------------------------------------------------------------------------------------------|
| Mm_Sm-mhc<br>(Myh11) | Forward 5' - GCA GTG AGC TCT CAG TCA TC - 3'<br>Reverse 5' - CAA TGC CTC CTC TGA CAA GT - 3'      |
| Mm_Cnn1              | Forward 5' - GCT TGT CTG CTG AAG TAA AGA AC - 3'<br>Reverse 5' - TCC ATG AAG TTG TTC CCG ATG - 3' |
| Mm_Gli1              | Forward 5' - TTG GAT TGA ACA TGG CGT CT - 3'<br>Reverse 5' - CCT TTC TTG AGG TTG GGA TGA - 3'     |
| Mm_Hprt              | Forward 5' - GGC TAT AAG TTC TTT GCT GAC CTG C - 3'                                               |

|                                   |         |                                           |
|-----------------------------------|---------|-------------------------------------------|
|                                   | Reverse | 5' - GCT TGC AAC CTT AAC CAT TTT GGG - 3' |
| Mm_Gaphd                          | Forward | 5' - GCC TCC AAG GAG TAA GAA AC - 3'      |
|                                   | Reverse | 5' - GCC TCC AAG GAG TAA GAA AC - 3'      |
| Mm_Sm-mhc<br>(Myh11) for CHIP PCR | Forward | 5' - CCC TCC CTT TGC TAA ACA CA - 3'      |
|                                   | Reverse | 5' - CCA GAT CCT GGG TCC TTA CA - 3'      |

Primers used in this study from QIAGEN.

| Primer        | Product Name                                  | Product Code |
|---------------|-----------------------------------------------|--------------|
| mHprt-1       | Mm_Hprt_1_SG QuantiTect Primer Assay          | QT00166768   |
| mS100 $\beta$ | Mm_S100 $\beta$ _1_SG QuantiTect Primer Assay | QT00151536   |
| mSox10        | Mm_Sox10_1_SG QuantiTect Primer Assay         | QT00295204   |
| mNestin       | Mm_Nes_1_SG QuantiTect Primer Assay           | QT00316799   |
| mGapdh        | Mm_Gapdh_3_SG QuantiTect Primer Assay         | QT01658692   |
| mPax6         | Mm_Pax6_1_SG QuantiTect Primer Assay          | QT01052786   |
| mPax1         | Mm_Pax1_1_SG QuantiTect Primer Assay          | QT01052779   |
| mKdr          | Mm_Kdr_1_SG QuantiTect Primer Assay           | QT00097020   |
| mTbx6         | Mm_Tbx6_1_SG QuantiTect Primer Assay          | QT00098861   |
| hCNN1         | Hs_CNN1_1_SG_QuantiTech Primer                | QT00067718   |
| hHPRT1        | Hs_HPRT1_1_SG QuantiTect Primer               | QT00059066   |
| hMYH11        | Hs_MYH11_1_SG QuantiTech Primer               | QT00069391   |
| hS100 $\beta$ | Hs_S100B_1_SG QuantiTect Primer Assay         | QT00059164   |
| rCnn1         | Rn_Cnn1_1_SG QuantiTect Primer                | QT01081115   |
| rGli1         | Rn_Gli1_1_SG QuantiTect Primer                | QT01290324   |
| rGapdh        | Rn_Gapd_1_SG QuantiTect Primer                | QT00199633   |
| rHprt-1       | Rn_Hprt1_1_SG QuantiTect Primer               | QT00199640   |

### Supplementary Table V

Antibodies and their corresponding dilutions used in Flow Cytometry.

| Antibody/Product Name                         | Supplier/Product Number           | Dilutions |
|-----------------------------------------------|-----------------------------------|-----------|
| Rat anti-mouse Sca1 (Ly-6A/E) [E13-161.7]     | STEMCELL Technology (60032)       | 1/100     |
| Rat anti-mouse IgG2a, kappa Isotype [RTK2758] | STEMCELL Technology (60076)       | 1/100     |
| Rabbit Anti-mouse/rat S100 $\beta$ [EP1576Y]  | Abcam (ab52642)                   | 1/100     |
| Normal Rabbit IgG (F graded)                  | Cell Signalling Technology (2729) | 1/100     |
| Alexa Fluor 647 Goat anti-mouse (H+L)         | Life Technologies (A- A-21235)    | 1/100     |
